# Supplementary material for: Cytosporone B is an agonist for nuclear orphan receptor Nur77
Source: Springer Nature journal article supplement (doi:10.1038/nchembio.106), 2008-08-10
Supplement: 41589_2008_BFnchembio106_MOESM1_ESM.mol [file 41589_2008_BFnchembio106_MOESM1_ESM.mol]

  Chem3D  07240814193D

 49 49  0  0  0  0  0  0  0  0999 V2000
   -2.5513    3.0771   -0.1749 C   0  0  0  0  0  0  0  0  0  0  0  0
   -2.2463    1.7097   -0.0479 C   0  0  0  0  0  0  0  0  0  0  0  0
   -3.2444    0.7802    0.3073 C   0  0  0  0  0  0  0  0  0  0  0  0
   -4.5432    1.2606    0.5110 C   0  0  0  0  0  0  0  0  0  0  0  0
   -4.8848    2.6099    0.3844 C   0  0  0  0  0  0  0  0  0  0  0  0
   -3.8655    3.4976    0.0466 C   0  0  0  0  0  0  0  0  0  0  0  0
   -0.8263    1.3100   -0.3394 C   0  0  0  0  0  0  0  0  0  0  0  0
   -3.0282   -0.7169    0.4304 C   0  0  0  0  0  0  0  0  0  0  0  0
   -6.1581    3.0434    0.5757 O   0  0  0  0  0  0  0  0  0  0  0  0
   -1.6076    4.0077   -0.4807 O   0  0  0  0  0  0  0  0  0  0  0  0
   -0.0753    0.3663    0.5884 C   0  0  0  0  0  0  0  0  0  0  0  0
    1.4548    0.5267    0.5456 C   0  0  0  0  0  0  0  0  0  0  0  0
    2.1652   -0.6290    1.2718 C   0  0  0  0  0  0  0  0  0  0  0  0
    3.6937   -0.5704    1.1126 C   0  0  0  0  0  0  0  0  0  0  0  0
    4.3711   -1.8504    1.6302 C   0  0  0  0  0  0  0  0  0  0  0  0
    5.8933   -1.8290    1.4188 C   0  0  0  0  0  0  0  0  0  0  0  0
    6.5445   -3.1539    1.8385 C   0  0  0  0  0  0  0  0  0  0  0  0
   -2.5083   -1.4351   -0.8052 C   0  0  0  0  0  0  0  0  0  0  0  0
   -2.6110   -0.6618   -1.9159 O   0  0  0  0  0  0  0  0  0  0  0  0
   -2.0694   -1.1838   -3.0993 C   0  0  0  0  0  0  0  0  0  0  0  0
   -2.1127   -0.1031   -4.1747 C   0  0  0  0  0  0  0  0  0  0  0  0
   -2.0282   -2.5470   -0.7787 O   0  0  0  0  0  0  0  0  0  0  0  0
   -0.2578    1.7678   -1.3211 O   0  0  0  0  0  0  0  0  0  0  0  0
   -5.3542    0.5607    0.7703 H   0  0  0  0  0  0  0  0  0  0  0  0
   -4.1074    4.5690   -0.0507 H   0  0  0  0  0  0  0  0  0  0  0  0
   -2.3666   -0.9203    1.3013 H   0  0  0  0  0  0  0  0  0  0  0  0
   -3.9850   -1.2328    0.6777 H   0  0  0  0  0  0  0  0  0  0  0  0
   -6.1945    4.0008    0.4168 H   0  0  0  0  0  0  0  0  0  0  0  0
   -2.0163    4.8886   -0.4751 H   0  0  0  0  0  0  0  0  0  0  0  0
   -0.4372    0.5009    1.6339 H   0  0  0  0  0  0  0  0  0  0  0  0
   -0.3013   -0.6711    0.2546 H   0  0  0  0  0  0  0  0  0  0  0  0
    1.7983    0.5299   -0.5164 H   0  0  0  0  0  0  0  0  0  0  0  0
    1.7485    1.5041    0.9964 H   0  0  0  0  0  0  0  0  0  0  0  0
    1.8951   -0.6205    2.3542 H   0  0  0  0  0  0  0  0  0  0  0  0
    1.8016   -1.5953    0.8474 H   0  0  0  0  0  0  0  0  0  0  0  0
    3.9468   -0.4462    0.0328 H   0  0  0  0  0  0  0  0  0  0  0  0
    4.0930    0.3201    1.6530 H   0  0  0  0  0  0  0  0  0  0  0  0
    4.1449   -1.9810    2.7150 H   0  0  0  0  0  0  0  0  0  0  0  0
    3.9464   -2.7317    1.0927 H   0  0  0  0  0  0  0  0  0  0  0  0
    6.1205   -1.6402    0.3422 H   0  0  0  0  0  0  0  0  0  0  0  0
    6.3401   -0.9911    2.0054 H   0  0  0  0  0  0  0  0  0  0  0  0
    7.6482   -3.1232    1.6876 H   0  0  0  0  0  0  0  0  0  0  0  0
    6.3534   -3.3736    2.9136 H   0  0  0  0  0  0  0  0  0  0  0  0
    6.1467   -4.0042    1.2383 H   0  0  0  0  0  0  0  0  0  0  0  0
   -2.6696   -2.0688   -3.4152 H   0  0  0  0  0  0  0  0  0  0  0  0
   -1.0113   -1.4900   -2.9227 H   0  0  0  0  0  0  0  0  0  0  0  0
   -1.7020   -0.4839   -5.1381 H   0  0  0  0  0  0  0  0  0  0  0  0
   -1.5101    0.7852   -3.8750 H   0  0  0  0  0  0  0  0  0  0  0  0
   -3.1575    0.2373   -4.3589 H   0  0  0  0  0  0  0  0  0  0  0  0
  1  2  1  0      
  1  6  2  0      
  1 10  1  0      
  2  3  2  0      
  2  7  1  0      
  3  4  1  0      
  3  8  1  0      
  4  5  2  0      
  4 24  1  0      
  5  6  1  0      
  5  9  1  0      
  6 25  1  0      
  7 11  1  0      
  7 23  2  0      
  8 18  1  0      
  8 26  1  0      
  8 27  1  0      
  9 28  1  0      
 10 29  1  0      
 11 12  1  0      
 11 30  1  0      
 11 31  1  0      
 12 13  1  0      
 12 32  1  0      
 12 33  1  0      
 13 14  1  0      
 13 34  1  0      
 13 35  1  0      
 14 15  1  0      
 14 36  1  0      
 14 37  1  0      
 15 16  1  0      
 15 38  1  0      
 15 39  1  0      
 16 17  1  0      
 16 40  1  0      
 16 41  1  0      
 17 42  1  0      
 17 43  1  0      
 17 44  1  0      
 18 19  1  0      
 18 22  2  0      
 19 20  1  0      
 20 21  1  0      
 20 45  1  0      
 20 46  1  0      
 21 47  1  0      
 21 48  1  0      
 21 49  1  0      
M  END
